# Supplementary material
Source: ML conference proceedings conference paper supplement (https://aclanthology.org/D19-1419)
Supplement: Attachment [file D19-1419.Attachment.zip]

Archive with 3 entries (2 files):
- Achieving_Verified_Robustness_to_Symbol_Substitutions_via_Interval_Bound_Propagation_appendix.pdf
- __MACOSX/
- __MACOSX/._Achieving_Verified_Robustness_to_Symbol_Substitutions_via_Interval_Bound_Propagation_appendix.pdf
